# Supplementary material for: Novel carbon channels from loofah sponge for construction of metal sulfide/carbon composites with robust electrochemical energy storage
Source: Royal Society of Chemistry journal article supplement (doi:10.1039/c7ta01154g), 2017-01-01
Supplement: c7ta01154g1.pdf [file c7ta01154g1.pdf]

## Supporting Information

### **Novel carbon channels from loofah sponge for construction of metal sulfide@carbon composites with robust electrochemical energy storage**

Dong Xie,<sup>a</sup> Xin-hui Xia,<sup>a\*</sup> Wang-jia Tang,<sup>a</sup> Yu Zhong,<sup>a</sup> Ya-dong Wang,<sup>b</sup> Dong-huang Wang,<sup>a</sup> Xiu-li Wang,<sup>a</sup> and Jiang-ping Tu<sup>a\*</sup>

<sup>a</sup> *State Key Laboratory of Silicon Materials, Key Laboratory of Advanced Materials and Applications for Batteries of Zhejiang Province, and School of Materials Science and Engineering, Zhejiang University, Hangzhou 310027, China*

*\*Email: helloxxh@zju.edu.cn; tujp@zju.edu.cn*

<sup>b</sup> *School of Engineering, Nanyang Polytechnic, 569830, Singapore*

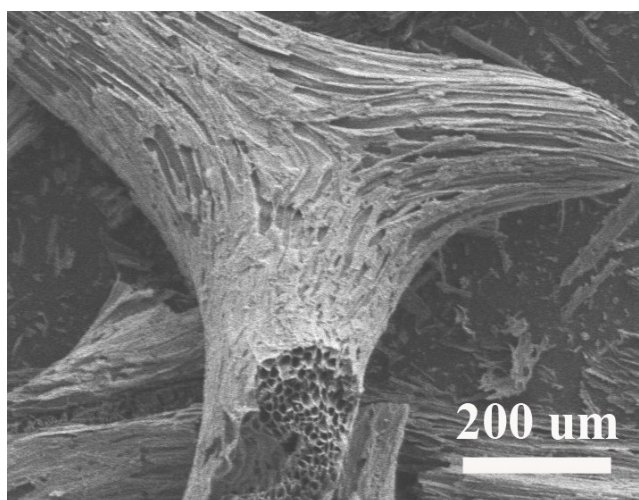

**Figure S1.** SEM image of pristine loofah sponge fibre.

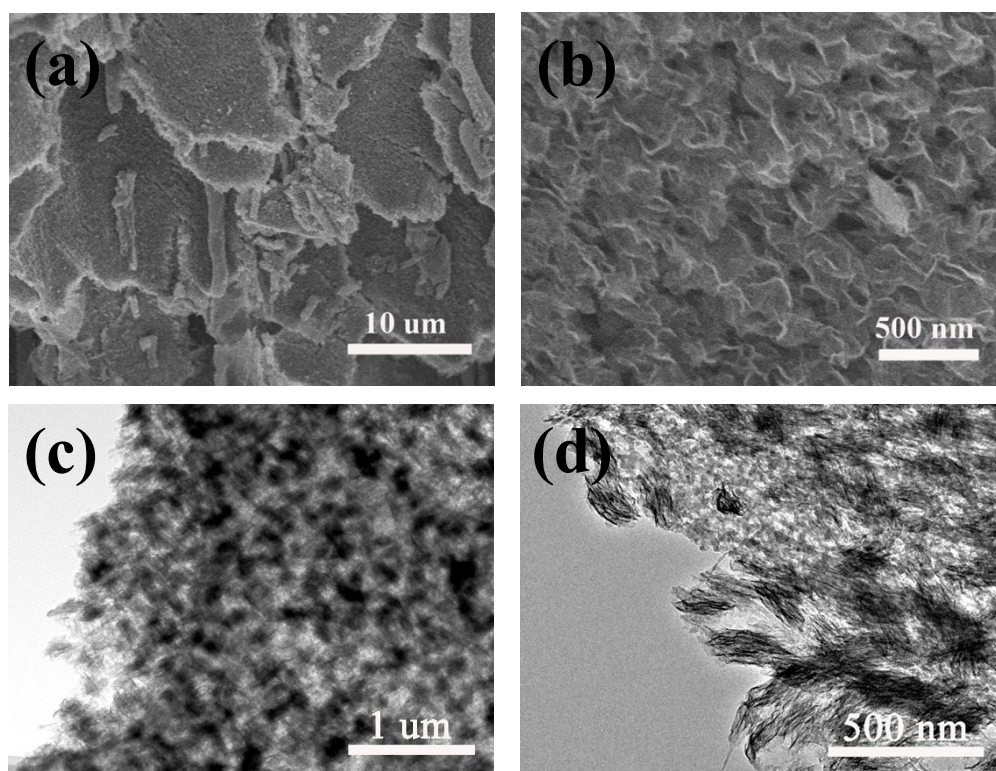

**Figure S2.** SEM (a-b) and TEM (c-d) images of LSDCM/MoS<sub>2</sub>.

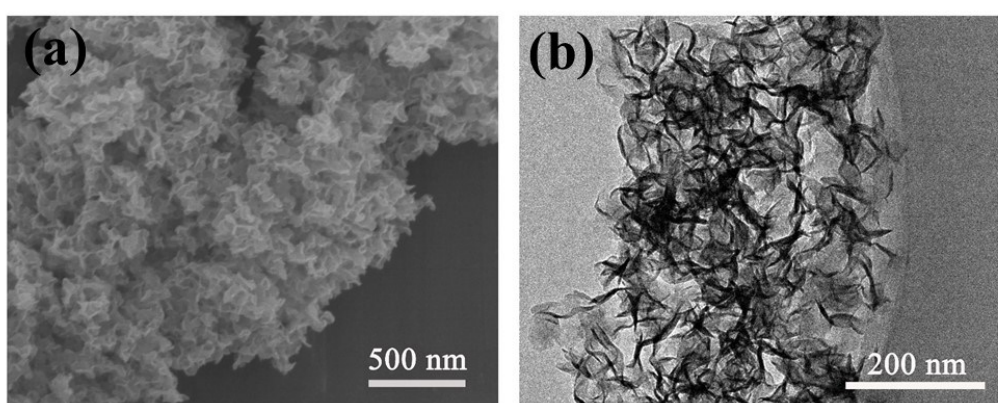

**Figure S3.** SEM (a) and TEM (b) images of pristine MoS<sub>2</sub>.

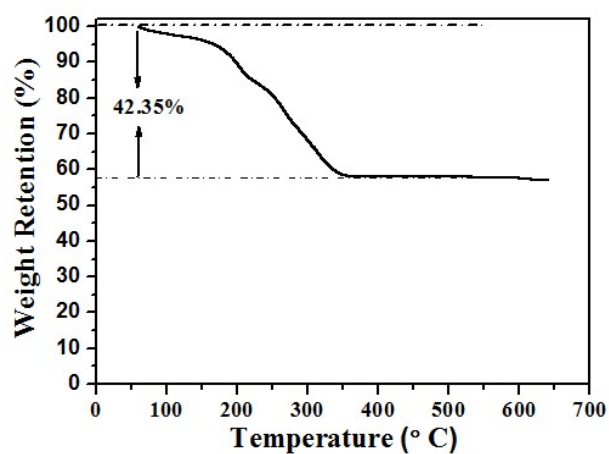

**Figure S4.** TGA curve of LSDCM/MoS<sub>2</sub>/N-C composite

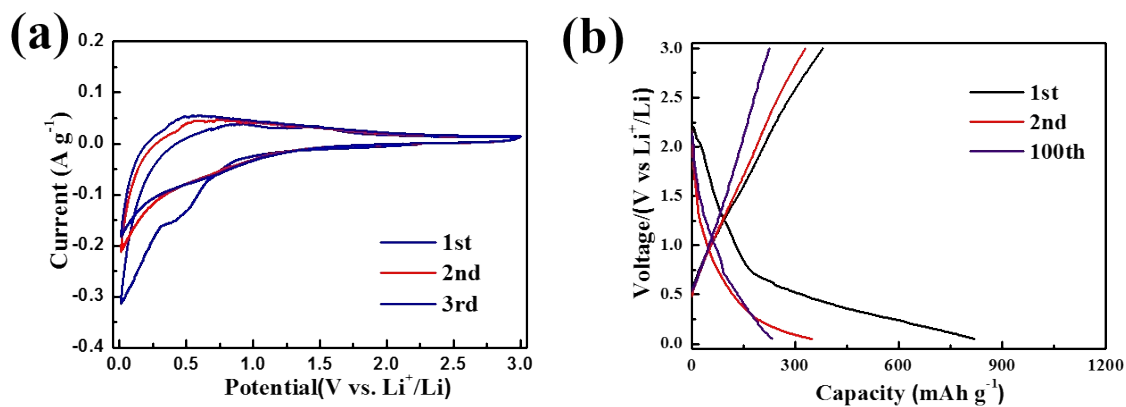

**Figure S5.** Electrochemical performance of LSDCM used in LIBs: (a) CV curves at a scan rate of 0.1 mV s<sup>-1</sup> between 0.01 and 3.0 V and (b) Galvanostatic discharge/charge profiles at 200 mA g<sup>-1</sup>.

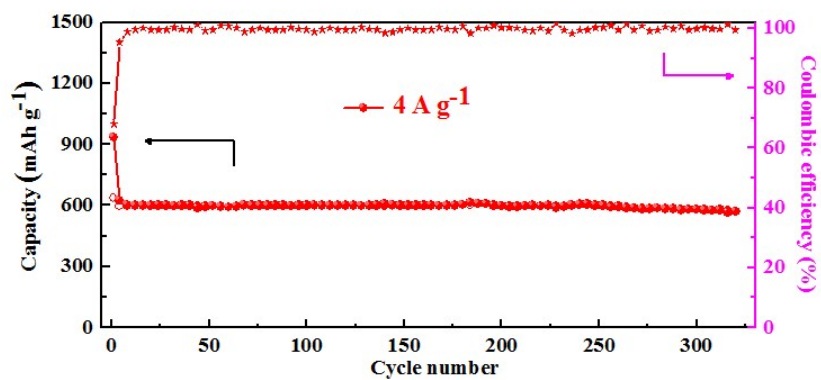

**Figure S6.** Cycling stability of LSDCM/MoS<sub>2</sub>/N-C for LIBs at a high current density of 4 A g<sup>-1</sup>

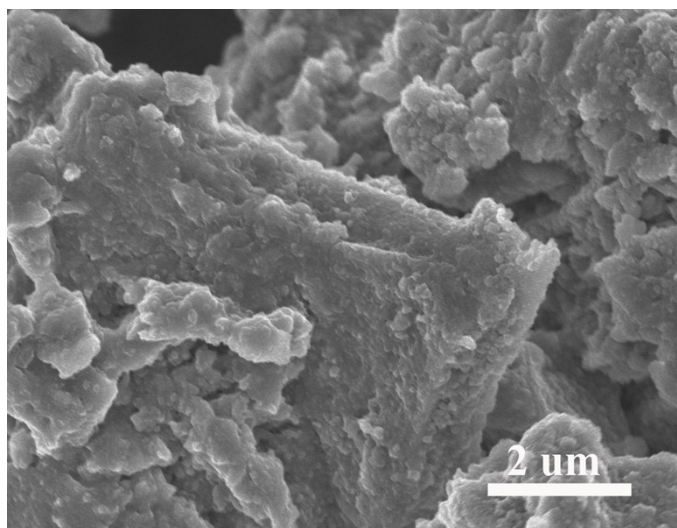

**Figure S7.** A SEM image of LSDCM/MoS<sub>2</sub>/N-C after 50 cycles.

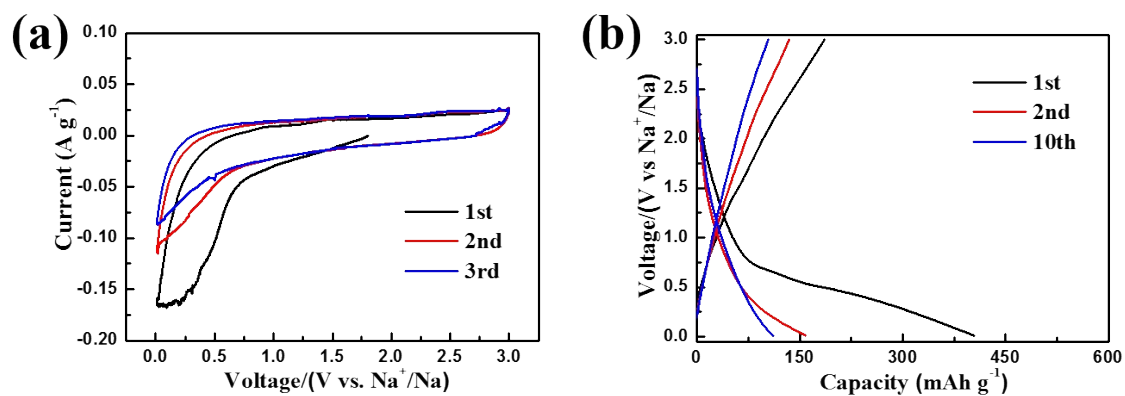

**Figure S8.** Electrochemical performance of LSDCM for SIBs: (a) CV curves at a scan rate of  $0.1 \text{ mV s}^{-1}$  between 0.01 and 3.0 V (vs.  $\text{Na}^+/\text{Na}$ ) and (b) Galvanostatic discharge-charge profiles at  $200 \text{ mA g}^{-1}$

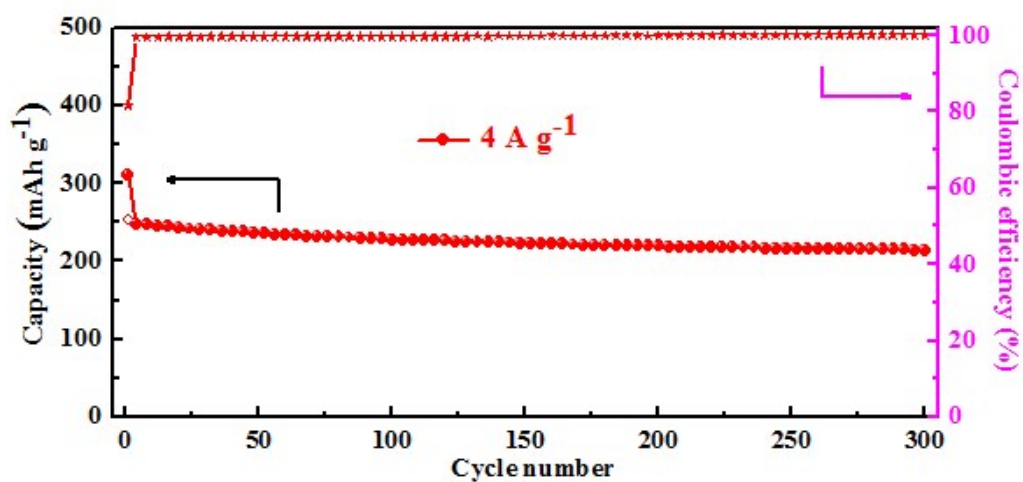

**Figure S9.** Cycling stability of LSDCM/ $\text{MoS}_2$ /N-C for SIBs at a high current density of  $4 \text{ A g}^{-1}$



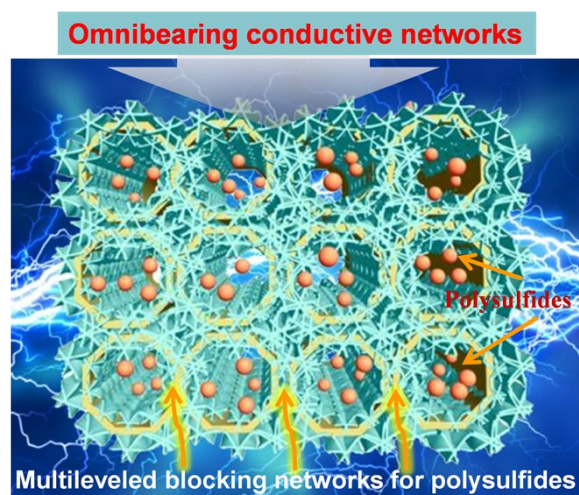

**Figure S10.** Schematic illustration of advantages for lithium or sodium storage.
